# Supplementary material for: Menopausal Vasomotor Symptoms and Risk of Incident Cardiovascular Disease Events in SWAN
Source: PubMed Central journal article supplement — J Am Heart Assoc. 2021 Jan 20;10(3):e017416. doi: 10.1161/JAHA.120.017416 (PMC7955448; doi:10.1161/jaha.120.017416), 2021-01-20
Supplement: JAH3-10-e017416-s001.pdf [file JAH3-10-e017416-s001.pdf]

# **Supplemental Material**

**Table S1. Baseline characteristics by inclusion in analytic sample: The Study of Women's Health Across the Nation (SWAN).**

|                         | Included<br>(N=3083) | Excluded<br>(N=219) |
|-------------------------|----------------------|---------------------|
| Age, median (Q1-Q3)     | 46.0 (44.0 - 48.0)   | 46.0 (44.0 - 48.0)  |
| Race/Ethnicity, % (n)   |                      |                     |
| Black                   | 28.4 (875)           | 26.9 (59)           |
| White                   | 47.5 (1464)          | 39.7 (87)           |
| Chinese                 | 7.8 (242)            | 3.7 (8)             |
| Hispanic                | 7.4 (227)            | 26.9 (59)           |
| Japanese                | 8.9 (275)            | 2.7 (6)             |
| Education, % (n)        |                      |                     |
| High school or less     | 23.8 (727)           | 42.8 (92)           |
| Vocational/some college | 32.5 (993)           | 27.0 (58)           |
| College or higher       | 43.7 (1336)          | 30.2 (65)           |
| Financial strain, % (n) |                      |                     |
| Somewhat/very hard      | 38.6 (1182)          | 60.5 (130)          |
| Not hard                | 61.4 (1883)          | 39.5 (85)           |
| Menopause stage, % (n)  |                      |                     |

|                                           | Included<br>(N=3083)  | Excluded<br>(N=219)   |
|-------------------------------------------|-----------------------|-----------------------|
| Early perimenopause                       | 45.7 (1402)           | 46.7 (99)             |
| Premenopause                              | 54.1 (1658)           | 52.8 (112)            |
| Unknown                                   | 0.2 (5)               | 0.5 (1)               |
| BMI, median (Q1-Q3)                       | 26.5 (22.8 - 32.0)    | 28.6 (24.5 - 33.6)    |
| SBP (mmHg), median (Q1-Q3)                | 115.0 (106.0 - 127.0) | 119.0 (111.0 - 130.0) |
| DBP (mmHg), median (Q1-Q3)                | 74.0 (69.0 - 81.0)    | 80.0 (71.0 - 84.0)    |
| LDL-C cholesterol (mg/dl), median (Q1-Q3) | 114.0 (94.0 - 135.0)  | 119.0 (99.0 - 136.5)  |
| HDL-C (mg/dl), median (Q1-Q3)             | 54.0 (46.0 - 64.0)    | 50.0 (42.0 - 58.0)    |
| Triglycerides (mg/dl), median (Q1-Q3)     | 90.0 (67.0 - 129.0)   | 106.0 (75.0 - 156.0)  |
| HOMA-IR, median (Q1-Q3)                   | 1.8 (1.3 - 3.0)       | 2.5 (1.5-4.5)         |
| Smoking status, % (n)                     |                       |                       |
| Past/never                                | 83.3 (2568)           | 69.4 (152)            |
| Current                                   | 16.7 (513)            | 30.6 (67)             |
| Physical activity score, median (Q1-Q3)   | 7.6 (6.4 - 8.9)       | 7.3 (5.8 - 8.8)       |
| Medication use                            |                       |                       |
| BP lowering, % (n)                        | 14.2 (439)            | 14.6 (32)             |

|                                   | Included<br>(N=3083) | Excluded<br>(N=219) |
|-----------------------------------|----------------------|---------------------|
| Lipid lowering, % (n)             | 1.0 (31)             | 1.4 (3)             |
| Anti-diabetics, % (n)             | 2.7 (84)             | 6.8 (15)            |
| Estradiol (pg/mL), median (Q1-Q3) | 54.8 (32.8 - 88.2)   | 62.7 (34.5 - 96.3)  |

VMS = vasomotor symptoms; BMI = body mass index; BP = blood pressure; SBP = systolic blood pressure; DBP = diastolic blood pressure; LDL-C = low density lipoprotein cholesterol; HDL-C = high density lipoprotein cholesterol; HOMA-IR = homeostatic model assessment insulin resistance

**Table S2. Relation between baseline VMS and adjudicated nonfatal CVD events in SWAN (N=3083).**

|                                   | Model 1          | Model 2          |
|-----------------------------------|------------------|------------------|
|                                   | HR (95% CI)      | HR (95% CI)      |
|                                   | P value          | P value          |
| Frequency of VMS, prior two weeks |                  |                  |
| 1-5 days                          | 1.94 (1.12-3.36) | 1.64 (0.93-2.88) |
|                                   | 0.02             | 0.087            |
| ≥6 days                           | 2.58 (1.33-5.00) | 2.25 (1.12-4.51) |
|                                   | 0.01             | 0.02             |

Relative to no VMS, prior two weeks

Model 1: Adjusted for site, baseline age, race/ethnicity

Model 2: Adjusted for model 1 covariates + baseline education, financial strain, menopause stage, SBP, BMI, LDL-C, triglycerides, HOMA-IR, medication use (BP-lowering, lipid-lowering, anti-diabetic, hormone therapy), smoking, physical activity

**Table S3. Relation between VMS over the study and adjudicated nonfatal CVD events in SWAN (N=3083).**

|                                                                      | Model 1           | Model 2           |
|----------------------------------------------------------------------|-------------------|-------------------|
|                                                                      | HR (95% CI)       | HR (95% CI)       |
|                                                                      | P value           | P value           |
| Persistent frequent VMS (>33% of attended visits with frequent VMS)* | 2.15 (1.30, 3.55) | 1.99 (1.16, 3.40) |
|                                                                      | 0.003             | 0.01              |

\*Relative to  $\leq 33\%$  of attended visits with frequent VMS

Frequent VMS: VMS  $\geq 6$  days in the prior two weeks; Missing covariate values imputed based upon mean levels

Model 1: Adjusted for site, baseline age, race/ethnicity, number of attended visits

Model 2: Adjusted for model 1 covariates + baseline education, average financial strain, baseline menopause stage, average systolic blood pressure, average body mass index, average low density lipoprotein cholesterol, average triglycerides, average homeostatic model assessment insulin resistance, average physical activity, proportion of visits smoking, medication use (proportion of visits using blood pressure-lowering, lipid-lowering, anti-diabetic, hormone therapy), number of attended visits

**Table S4. Relation between VMS and combined incident fatal and nonfatal CVD events in SWAN, adjusting for endogenous estradiol concentrations (N=3083).**

|                                                                                     | HR (95% CI)       |
|-------------------------------------------------------------------------------------|-------------------|
|                                                                                     | P value           |
| Baseline frequency of VMS, past two weeks*                                          |                   |
| 1-5 days                                                                            | 1.01 (0.74, 1.37) |
|                                                                                     | 0.98              |
| ≥6 days                                                                             | 1.48 (1.03-2.14)  |
|                                                                                     | 0.03              |
| Persistent frequent VMS over the study (>33% of attended visits with frequent VMS)§ | 1.75 (1.32, 2.33) |
|                                                                                     | 0.0001            |

\*Relative to no VMS, prior two weeks, §Relative to ≤33% of attended visits with frequent (≥6 days in the prior two weeks) VMS; baseline VMS and persistent VMS considered in two separate models

Missing covariate values imputed based upon mean levels; For baseline VMS models, covariates derived from baseline; for persistent VMS models, covariates averaged over study (proportion of visits for categorical variables) with the exception of age, menopause stage, and education which were baseline values for both models

Adjusted for site, age, race/ethnicity, education, financial strain, menopause stage, SBP, BMI, LDL-C, triglycerides, HOMA-IR, medication use (BP-lowering, lipid-lowering, anti-diabetic, hormone therapy), smoking, physical activity, endogenous estradiol, cycle day of blood draw (baseline VMS models), and number of attended visits (VMS persistence models)
